# Supplementary material for: Comparison of the Arctic upper-air temperatures from radiosonde and radio occultation observations
Source: Copernicus journal article supplement (doi:10.5194/amt-2016-232), 2016-07-19
Supplement: Supplementary file [file amt-2016-232-AC1-supplement.zip]

Table R1. The number of spatio-temporally synchronized RS and COSMIC temperature measurements at 925 hPa at each RS sites.

| RS sites | NO. of matchups | RS sites | NO. of matchups | RS sites | NO. of matchups |
|----------|-----------------|----------|-----------------|----------|-----------------|
| 01001    | 24              | 01004    | 3               | 01028    | 23              |
| 01152    | 3               | 02185    | 12              | 02836    | 7               |
| 04220    | 9               | 04320    | 8               | 04339    | 9               |
| 04360    | 12              | 20046    | 6               | 20292    | 10              |
| 20674    | 28              | 20744    | 12              | 20891    | 11              |
| 21432    | 8               | 21824    | 14              | 21946    | 28              |
| 22113    | 10              | 22217    | 4               | 22271    | 24              |
| 23078    | 2               | 23205    | 28              | 23330    | 22              |
| 23418    | 12              | 23472    | 13              | 24125    | 6               |
| 24266    | 0               | 24343    | 15              | 25123    | 19              |
| 25400    | 5               | 25428    | 0               | 70026    | 33              |
| 70133    | 18              | 71043    | 2               | 71081    | 27              |
| 71082    | 8               | 71917    | 0               | 71924    | 26              |
| 71925    | 33              | 71957    | 13              |          |                 |
