# Supplementary material for: Comparison of the Arctic upper-air temperatures from radiosonde and radio occultation observations
Source: Copernicus journal article supplement (doi:10.5194/amt-2016-232), 2016-07-19
Supplement: Supplementary file [file amt-2016-232-AC1-supplement.zip]

Table R3. The temperature anomalies at RS and correspondent RO grid on 2012.

| RS ID | Spring |      |      | Summer |      |      | Autumn |       |      | Winter |     |      |
|-------|--------|------|------|--------|------|------|--------|-------|------|--------|-----|------|
|       | RO     | RS   | Diff | RO     | RS   | Diff | RO     | RS    | Diff | RO     | RS  | Diff |
| 01001 | 4.1    | 2.1  | 2.0  | 0.8    | 0.2  | 0.6  | -1.6   | 0.5   | -2.1 | 1.8    | 1.3 | 0.5  |
| 01004 | 3.6    | 2.1  | 1.5  | -0.1   | 1.3  | -1.4 | -3.2   | -1.1  | -2.1 | 5.9    | 4.7 | 1.2  |
| 01028 | 1.7    | 2.6  | -0.9 | -0.8   | 1.5  | -2.3 | -1.9   | 0.2   | -2.1 | 4.2    | 3.1 | 1.1  |
| 01152 | 2.9    | 3.3  | -0.4 | 0.3    | 1.7  | -1.4 | 1.7    | 2.2   | -0.5 | 1.0    | 1.0 | 0    |
| 02185 | 1.5    | 3.6  | -2.1 | 0.6    | 3.0  | -2.4 | 0.6    | 1.2   | -0.6 | 0.7    | 2.4 | -1.7 |
| 02836 | 3.0    | 4.4  | -1.4 | 2.5    | 1.8  | 0.7  | -0.7   | 1.6   | -2.3 | 1.5    | 1.6 | -0.1 |
| 04220 | 0.2    | 0.03 | 0.2  | -3.7   | -2.5 | -1.2 | -2.5   | -1.8  | -0.7 | 6.4    | 4.8 | 1.6  |
| 04320 | 3.0    | 1.2  | 1.8  | 1.5    | -0.4 | 1.9  | -3.4   | -1.2  | -2.2 | 7.4    | 4.1 | 3.3  |
| 04339 | -0.4   | 1.1  | -1.5 | -0.5   | -1.1 | 0.6  | -1.6   | -1.0  | -0.6 | 3.1    | 1.6 | 1.5  |
| 04360 | 0.1    | -1.1 | 1.2  | -1.2   | -3.3 | 2.1  | -1.2   | -1.7  | 0.5  | 4.2    | 3.8 | 0.4  |
| 20046 | -0.7   | 2.2  | -2.9 | 2.7    | 2.0  | 0.7  | -1.4   | -1.3  | -0.1 | 3.3    | 4.6 | -1.3 |
| 20292 | 2.1    | 1.3  | 0.8  | 1.8    | -0.4 | 2.2  | -1.8   | -1.4  | -0.4 | 5.9    | 4.7 | 1.2  |
| 20674 | 1.6    | 2.7  | -1.1 | -0.4   | -0.5 | 0.1  | -2.3   | -1.2  | -1.1 | 3.9    | 3.9 | 0    |
| 20744 | 3.3    | 3.0  | 0.3  | 1.3    | 1.2  | 0.1  | 1.2    | -0.9  | 2.1  | 3.7    | 3.4 | 0.3  |
| 20891 | 2.1    | 2.4  | -0.3 | -1.8   | -1.0 | -0.8 | NaN    | NaN   | NaN  | NaN    | NaN | NaN  |
| 21432 | 0.5    | 3.5  | -3.0 | 0.5    | 2.1  | -1.6 | -0.6   | 0.01  | -0.6 | 1.8    | 6.3 | -4.5 |
| 21824 | 0.6    | 1.7  | -1.1 | -0.7   | -0.2 | -0.5 | 0.4    | -0.8  | 1.2  | 2.7    | 2.9 | -0.2 |
| 21946 | 0.3    | 1.5  | -1.2 | 0.6    | 0.9  | -0.3 | -0.4   | 0.2   | -0.6 | 3.1    | 3.1 | 0    |
| 22113 | 2.3    | 3.1  | -0.8 | 1.0    | 1.3  | -0.3 | -0.1   | 1.2   | -1.3 | 3.7    | 1.4 | 2.3  |
| 22217 | 1.7    | 2.8  | -1.1 | 1.2    | 1.8  | -0.6 | -1.0   | 1.2   | -2.2 | 2.3    | 1.2 | 1.1  |
| 22271 | 2.5    | 3.1  | -0.6 | 3.0    | 2.0  | 1.0  | 0.6    | 0.1   | 0.5  | 3.0    | 1.2 | 1.8  |
| 23078 | 3.0    | 2.7  | 0.3  | -1.8   | -2.8 | 1.0  | -2.0   | -0.7  | -1.3 | 3.6    | 3.5 | 0.1  |
| 23205 | 3.3    | 2.8  | 0.5  | 1.3    | 1.6  | -0.3 | 1.2    | -1.1  | 2.3  | 3.7    | 1.5 | 2.2  |
| 23330 | 1.7    | 2.3  | -0.6 | -1.4   | -0.8 | -0.6 | -1.8   | -1.0  | -0.8 | 2.8    | 1.7 | 1.1  |
| 23418 | 1.4    | 2.3  | -0.9 | 0.2    | 0.5  | -0.3 | NaN    | NaN   | NaN  | NaN    | NaN | NaN  |
| 23472 | 1.9    | 1.3  | 0.6  | -3.0   | -4.2 | 1.2  | -1.1   | 0.5   | -1.6 | 2.7    | 2.8 | -0.1 |
| 24125 | 2.3    | 1.9  | 0.4  | -1.1   | -0.6 | -0.5 | -1.5   | -0.5  | -1.0 | 0.2    | 3.2 | -3.0 |
| 24266 | 2.4    | 2.3  | 0.1  | 1.0    | 1.0  | 0    | -0.5   | -0.4  | -0.1 | 3.7    | 2.2 | 1.5  |
| 24343 | 2.5    | 1.8  | 0.7  | 0.9    | 0.7  | 0.2  | -0.1   | 0.3   | -0.4 | 2.0    | 2.7 | -0.7 |
| 25123 | -0.6   | 0.7  | -1.3 | 2.8    | 2.1  | 0.7  | -0.3   | -0.01 | -0.3 | 1.6    | 3.1 | -1.5 |
| 25400 | 1.0    | 1.6  | -0.6 | 1.5    | 2.0  | -0.5 | 0.3    | 0.2   | 0.1  | 0.5    | 1.5 | -1.0 |
| 25428 | 1.6    | 1.4  | 0.2  | 0.2    | 1.7  | -1.5 | 0.1    | -0.3  | 0.4  | 0.7    | 1.2 | -0.5 |
| 70026 | 0.2    | 1.9  | -1.7 | -0.3   | 1.0  | -1.3 | 0.6    | -0.2  | 0.8  | 2.8    | 3.9 | -1.1 |
| 70133 | 2.0    | 2.3  | -0.3 | 0.7    | 0.4  | 0.3  | -2.0   | -1.2  | -0.8 | 2.4    | 2.6 | -0.2 |
| 71043 | -0.1   | 0.7  | -0.8 | -1.8   | -0.2 | -1.6 | -1.0   | -0.8  | -0.2 | 3.2    | 2.6 | 0.6  |
| 71081 | 1.0    | 0.7  | 0.3  | 0.1    | 1.5  | -1.4 | -2.3   | -0.8  | -1.5 | 4.3    | 3.0 | 1.3  |
| 71082 | 1.8    | 0.1  | 1.7  | -1.6   | 0.3  | -1.9 | -1.1   | -1.5  | 0.4  | 6.2    | 5.2 | 1.0  |
| 71917 | 1.2    | -0.3 | 1.5  | 0.2    | 0.6  | -0.4 | -0.6   | -1.6  | 1.0  | 4.7    | 5.0 | -0.3 |
| 71924 | 1.4    | -0.4 | 1.8  | -0.1   | 0.7  | -0.8 | -2.0   | -1.1  | -0.9 | 5.2    | 4.2 | 1.0  |

|       |     |      |     |      |      |      |      |      |     |     |     |      |
|-------|-----|------|-----|------|------|------|------|------|-----|-----|-----|------|
| 71925 | 0.7 | -0.4 | 1.1 | -0.1 | 0.8  | -0.9 | -0.7 | -1.1 | 0.4 | 3.4 | 3.5 | -0.1 |
| 71957 | 1.2 | 1.1  | 0.1 | 1.1  | -0.3 | 1.4  | 0.1  | -0.3 | 0.4 | 3.4 | 3.6 | -0.2 |
